# Supplementary material for: Role of AP1 and Gadkin in the traffic of secretory endo-lysosomes
Source: PubMed Central journal article supplement — Mol Biol Cell. 2011 Jun 15;22(12):2068–82. doi: 10.1091/mbc.E11-03-0193 (PMC3113771; doi:10.1091/mbc.e11-03-0193), 2011-06-15

## LEGENDS OF THE SUPPLEMENTAL FIGURES

### Figure S1. Control experiments on the transport of Lamp1 to the cell surface

**(A)** Lamp1 transport does not depend on late endosomal lipid, LBPA. BHK cells were incubated with 50 $\mu$ g/mL anti-LBPA antibodies for 16h. After stimulation, cell surface Lamp-1 was observed without permeabilization (right panels) as in Fig1, or the endocytosed anti-LBPA antibody was revealed after permeabilization with a secondary fluorescent antibody (left panels). **(B-D)** Lamp1 transport does not require polymerized microtubules. BHK cells were treated or not for 2h with 1 $\mu$ M nocodazole and then stimulated as in Fig 1A. As indicated (B), cell surface Lamp1 was labeled without permeabilization as in Fig 1 or tubulin was immuno-labeled after permeabilization. Bars=10 $\mu$ m. Hexosaminidase release (C) was measured as in Fig 1A and cell surface biotinylation (D) was analyzed as in Fig 1D. C shows the means of 4 experiments +/-SEM. **(E)** Morphology of recycling endosomes after crosslinking with Tfn-HRP. A431 cells were incubated with Tfn-HRP for 15min at 37 $^{\circ}$  C, and then treated without or with DAB-H2O2 as indicated to inactivate the compartment by cross-linking, and processed for electron microscopy. Arrowheads point at tubular electron dense structures, which are not observed in controls, and presumably correspond to Tfn-containing recycling endosomes. Bars=2 $\mu$ m.

### Figure S2. Knockdown of the $\gamma$ 1 or $\mu$ 1 chain of AP1 and of the $\mu$ 3 chain of AP3

**(A-C)** The  $\mu$ 1 subunit of AP1 was depleted in A431 with siRNA si#2 $\mu$ 1 against a target sequence different from si#1 $\mu$ 1. After ionomycin stimulation, the release of hexosaminidase (A) and cathepsin D (B) was measured as in Fig 1A and 6A, respectively and cell surface biotinylation (C) was analyzed as in Fig 1D. Panel A shows the mean of 3 experiments +/-SEM. \*\*p<0.025. **(D)** The  $\mu$ 3 subunit of AP3 was depleted with siRNAs against 3 different target sequences (si#1 $\mu$ 3, si#2 $\mu$ 3, si#3 $\mu$ 3), used alone or in combination (triple), and, after ionomycin stimulation, the release of hexosaminidase (A) was measured as in Fig 1A. si#3 $\mu$ 3 is used in Fig 7. **(E)** A431 cells were transfected with siRNAs against the  $\gamma$ 1 subunit of AP1 (AP1 $\square$ ) and KD efficiency was estimated by western blotting. After stimulation with ionomycin, hexosaminidase release was measured in supernatants as in Fig 1A. AP1 $\square$  KD results (4 experiments) are shown +/- SEM compared to normalized mock controls.

### Figure S3. Knock down of clathrin heavy chain

The clathrin heavy chain (CHC) was depleted by RNAi (A). After ionomycin stimulation, the release of hexosaminidase (B) and cathepsin D (C) was measured as in Fig 1A and 6A, respectively. The appearance of Lamp1 on the plasma membrane was visualized by fluorescence microscopy in non-permeabilized cells without or with ionomycin stimulation, and was analyzed after cell surface biotinylation (E) as in Fig 1D. In (B), the means of 3 experiments is shown +/-SEM, \*\*p<0.025.

## LEGENDS OF THE SUPPLEMENTAL MOVIES

**Movie 1: Rab27a-GFP and Lamp1-cherry after stimulation by live TIRF microscopy.** A431 cells were transfected with Rab27a-GFP and Lamp1-cherry 24h before stimulation with 2.5 $\mu$ M ionomycin and imaged during 30s at room temperature with a Zeiss AxioObserver microscope equipped with Zeiss TIRF slider module and HQ2 Camera from Photometrics. Exposure time was 200ms. The movie illustrates the occurrence of fusion, as shown in the snapshots of Fig 5B.

**Movie 2. Lamp1-GFP by live confocal microscopy.** Lamp1-GFP transfected BHK cells were visualized with LSM510 Zeiss confocal microscope in a CO<sub>2</sub> chamber at 37° C during 3min (each frame: 6s 30). The Z position was changed by hand (at 100s) to observe perinuclear labeling at the equatorial level of the cells (nucleus is clearly visible), or high overall Lamp1 mobility (basal surface of cells without visible nucleus).

**Movie 3. Lamp1-GFP in U18666A-treated cells by live confocal microscopy.** Cells expressing Lamp1-GFP were treated overnight with U18666A to induce cholesterol accumulation in Lamp1-containing late endocytic compartments (see also Fig 2). Cells were imaged during 7min (equatorial section).

**Movie 4. Rab27a-GFP and Lamp1-cherry in U18666A-treated cells by live TIRF microscopy.** Cells transfected with Rab27a-GFP and Lamp1-cherry were treated overnight with U18666A and imaged by TIRF as in Movie1. Snapshots of the boxed area are shown in Fig 5C.

**Movie 5. Rab27a-GFP and Lamp1-cherry by live TIRF microscopy.**

The experiments were as in Movie1 but without ionomycin stimulation. Snapshots of the area boxed in the first frame are shown in Fig 5A.

**Movie 6. Gadkin-GFP and Lamp1-cherry by live TIRF microscopy.** A431 cells transfected with Gadkin-GFP and Lamp1-Cherry were imaged as in Movie1 but without ionomycin. Snapshots are shown in Fig 8B.

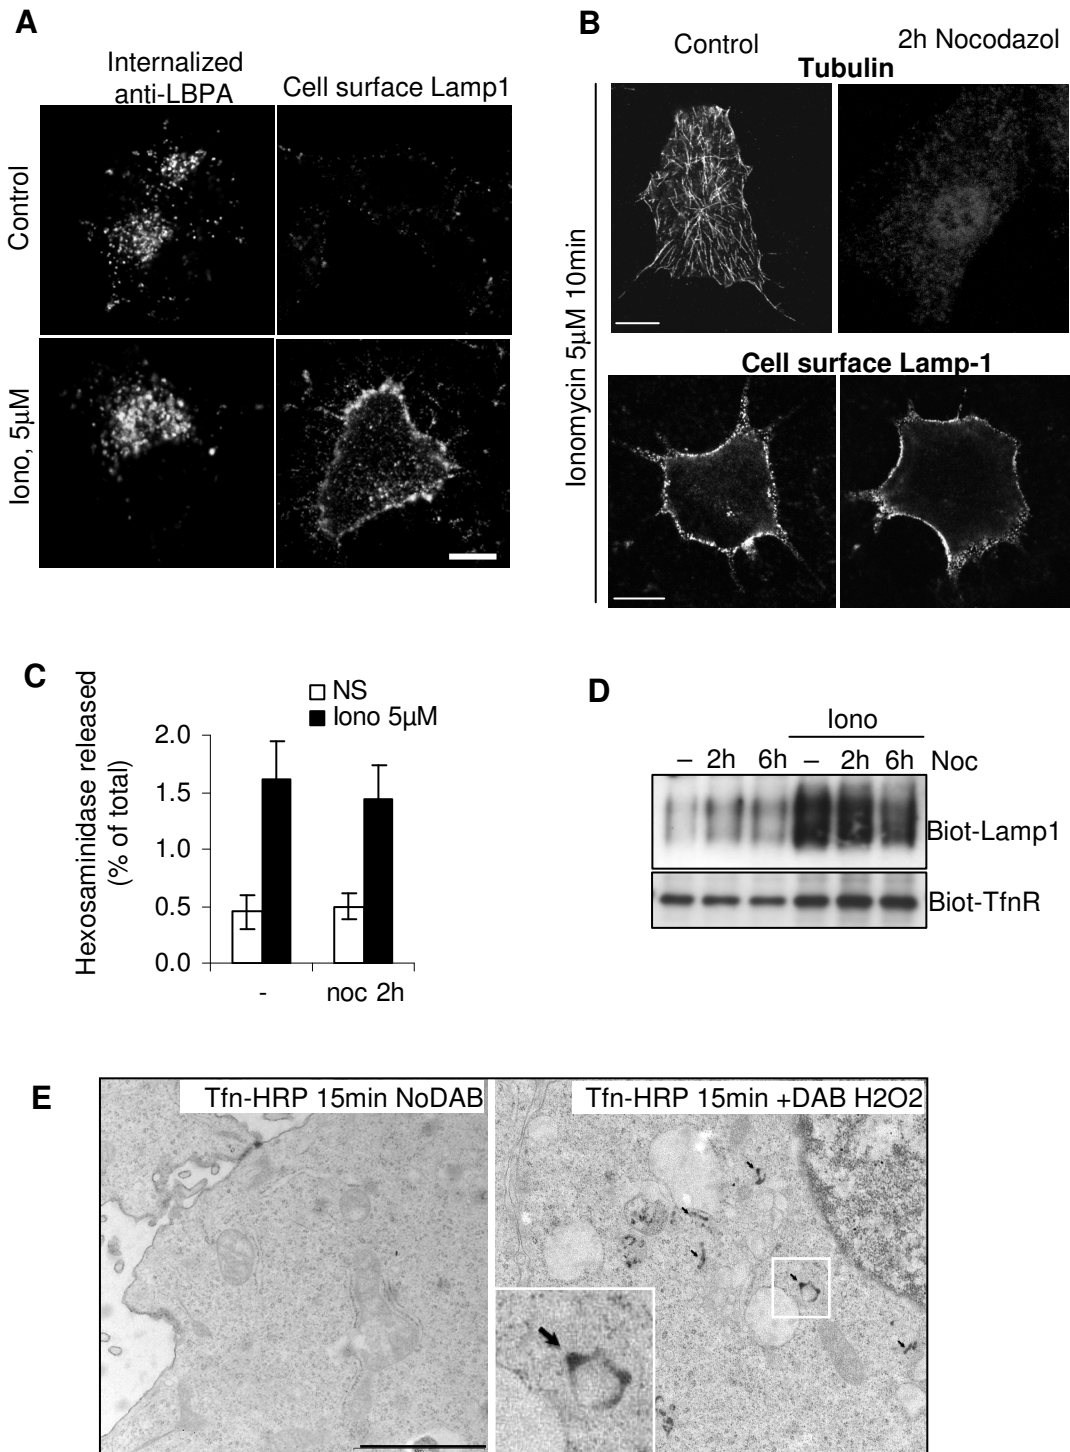

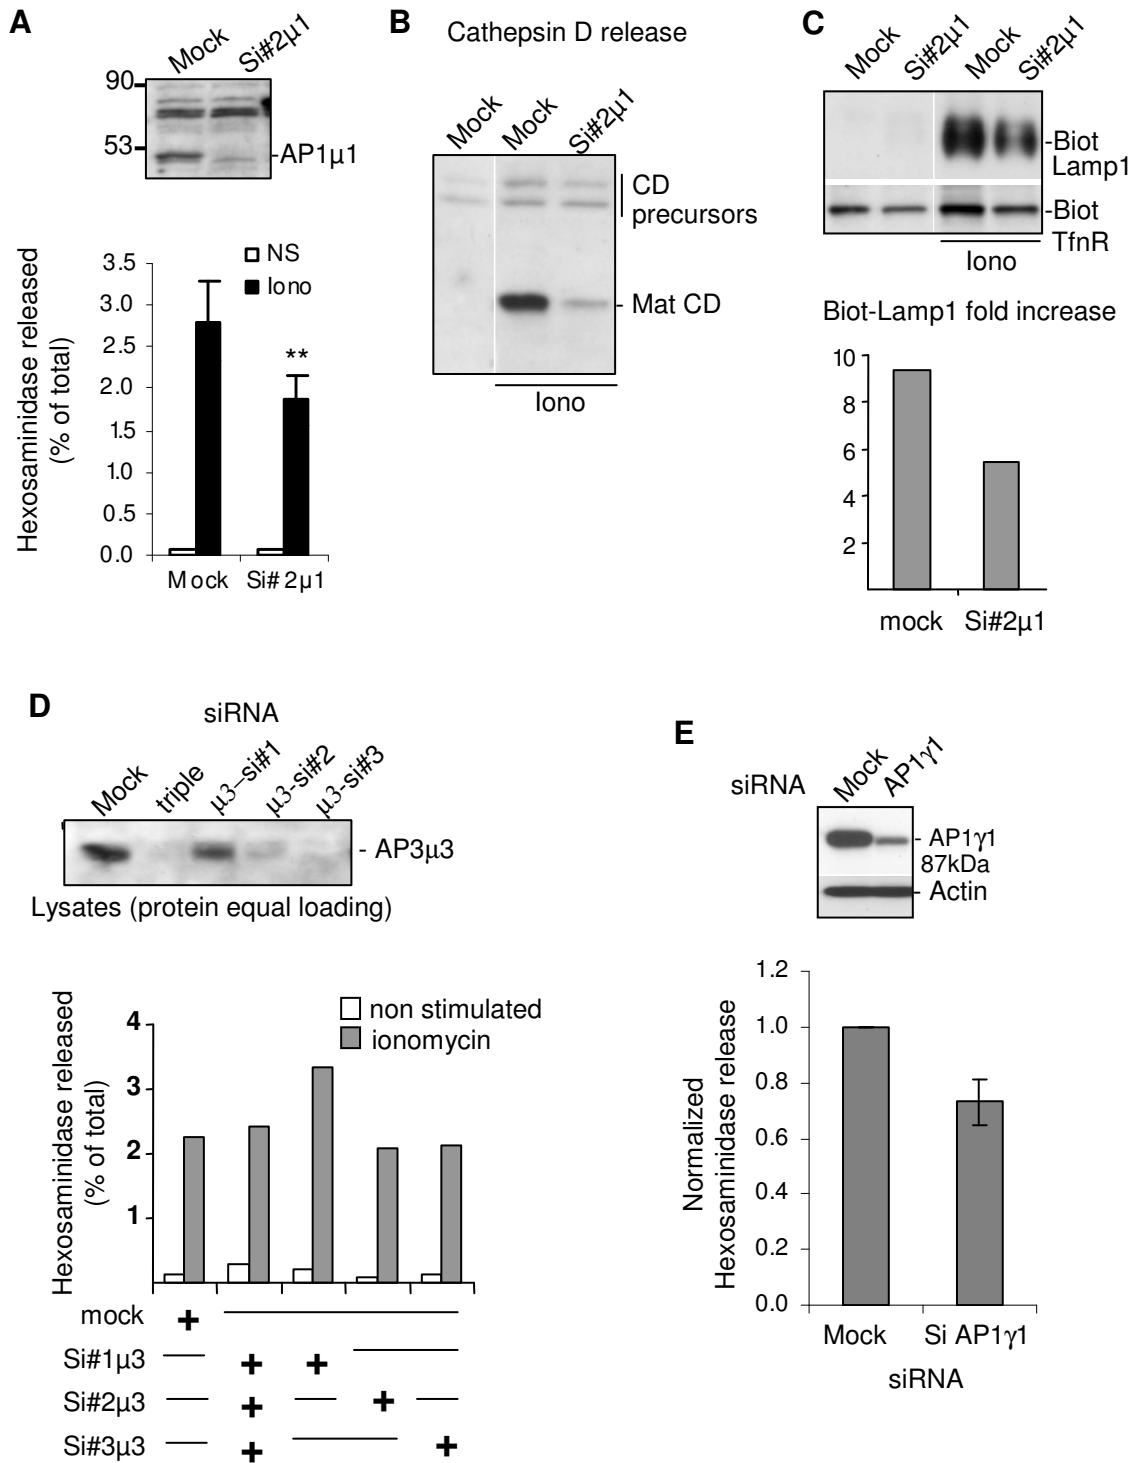



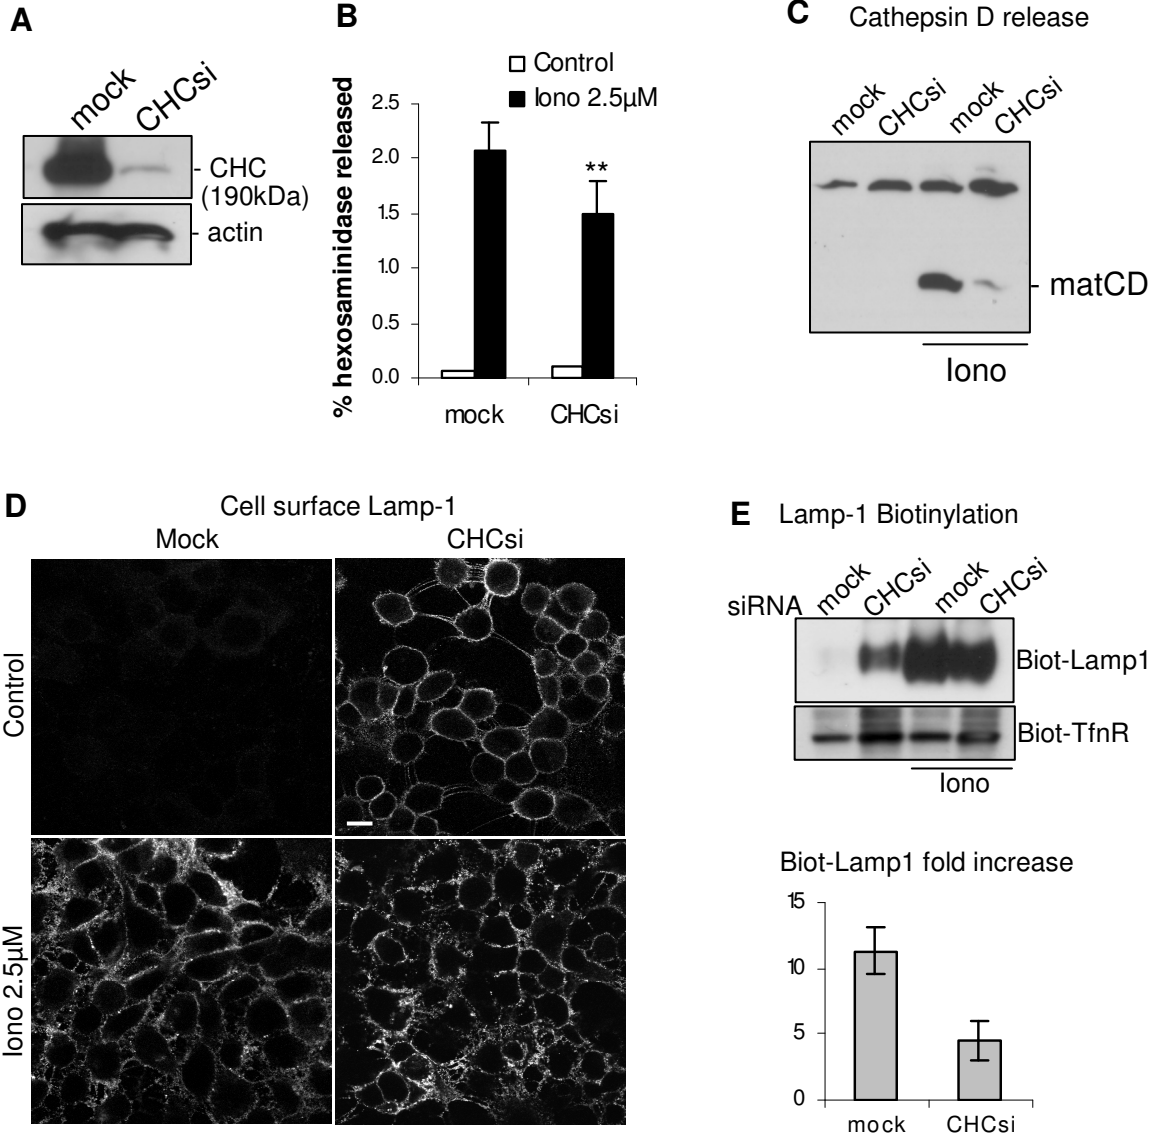

Supplement: E11-03-0193_1.pdf [file E11-03-0193_1.pdf]
